# Supplementary material for: Divalent Nonaqueous Metal-Air Batteries
Source: Frontiers journal article supplement (doi:10.3389/fenrg.2020.602918), 2021-02-12
Supplement: Table_1.docx [file Table_1.docx]

Supplementary information

**Divalent Nonaqueous Metal-Air Batteries**

Yi-Ting Lu1,2, Alex R. Neale1, Chi-Chang Hu2, Laurence J. Hardwick1

1. Stephenson Institute for Renewable Energy, Department of Chemistry, University of Liverpool, Liverpool, L69 7ZD, UK

2. Department of Chemical Engineering, National Tsing Hua University, Hsin-Chu, 30013, Taiwan

Citation labels for Figure 3

a & b) Connor, J.H., Reid Jr, W.E., and Wood, G.B. (1957). Electrodeposition of Metals from Organic Solutions: V. Electrodeposition of Magnesium and Magnesium Alloys. *J. Electrochem. Soc.* 104**,** 38. doi: 10.1149/1.2428492.

1. Brenner, A. (1971). Note on the Electrodeposition of Magnesium from an Organic Solution of a Magnesium‐Boron Complex. *J. Electrochem. Soc.* 118**,** 99. doi: 10.1149/1.2407964
   and
   Brenner, A., and Sligh, J. (1971). Electrodeposition of magnesium and beryllium from organic baths. *Trans. Inst. Met. Finish.* 49**,** 71-78. doi: 10.1080/00202967.1971.11870170.
2. Gregory, T.D., Hoffman, R.J., and Winterton, R.C. (1990). Nonaqueous electrochemistry of magnesium: applications to energy storage. *J. Electrochem. Soc.* 137**,** 775. doi: 10.1149/1.2086553
3. Liebenow, C. (1997). Reversibility of electrochemical magnesium deposition from Grignard solutions. *J. Appl. Electrochem.* 27**,** 221-225. doi: 10.1023/A:1018464210084.
4. Chusid, O., Gofer, Y., Gizbar, H., Vestfrid, Y., Levi, E., Aurbach, D., and Riech, I. (2003). Solid‐State Rechargeable Magnesium Batteries. *Adv. Mater.* 15**,** 627-630. doi: 10.1002/adma.200304415.
5. Mizrahi, O., Amir, N., Pollak, E., Chusid, O., Marks, V., Gottlieb, H., Larush, L., Zinigrad, E., and Aurbach, D. (2008). Electrolyte solutions with a wide electrochemical window for rechargeable magnesium batteries. *J. Electrochem. Soc.* 155**,** A103-A109. doi: 10.1149/1.2806175.
6. Kakibe, T., Yoshimoto, N., Egashira, M., and Morita, M. (2010). Optimization of cation structure of imidazolium-based ionic liquids as ionic solvents for rechargeable magnesium batteries. *Electrochem. commun.* 12**,** 1630-1633. doi: 10.1016/j.elecom.2010.09.012.
7. Guo, Y.-S., Zhang, F., Yang, J., Wang, F.-F., Nuli, Y., and Hirano, S.-I. (2012). Boron-based electrolyte solutions with wide electrochemical windows for rechargeable magnesium batteries. *Energy Environ. Sci.* 5**,** 9100-9106. doi: 10.1039/C2EE22509C
8. Kakibe, T., Hishii, J.-Y., Yoshimoto, N., Egashira, M., and Morita, M. (2012). Binary ionic liquid electrolytes containing organo-magnesium complex for rechargeable magnesium batteries. *J. Power Sources* 203**,** 195-200. doi: 10.1016/j.jpowsour.2011.10.127
9. Liu, T., Shao, Y., Li, G., Gu, M., Hu, J., Xu, S., Nie, Z., Chen, X., Wang, C., and Liu, J. (2014). A facile approach using MgCl2 to formulate high performance Mg2+ electrolytes for rechargeable Mg batteries. *J. Mater. Chem. A* 2**,** 3430-3438. doi: 10.1039/C3TA14825D
10. Shterenberg, I., Salama, M., Gofer, Y., Levi, E., and Aurbach, D. (2014). The challenge of developing rechargeable magnesium batteries. *MRS Bull.* 39**,** 453-460. doi: 10.1557/mrs.2014.61.
11. Shao, Y., Rajput, N.N., Hu, J., Hu, M., Liu, T., Wei, Z., Gu, M., Deng, X., Xu, S., and Han, K.S. (2015). Nanocomposite polymer electrolyte for rechargeable magnesium batteries. *Nano Energy* 12**,** 750-759. doi: 10.1016/j.nanoen.2014.12.028.
12. Luo, J., Bi, Y., Zhang, L., Zhang, X., and Liu, T.L. (2019a). A Stable, Non‐Corrosive Perfluorinated Pinacolatoborate Mg Electrolyte for Rechargeable Mg Batteries. *Angew. Chem. Int. Ed.* 58**,** 6967-6971. doi: 10.1002/anie.201902009.
13. Du, A., Zhang, H., Zhang, Z., Zhao, J., Cui, Z., Zhao, Y., Dong, S., Wang, L., Zhou, X., and Cui, G. (2019). A Crosslinked Polytetrahydrofuran‐Borate‐Based Polymer Electrolyte Enabling Wide‐Working‐Temperature‐Range Rechargeable Magnesium Batteries. *Adv. Mater.* 31**,** 1805930. doi: 10.1002/adma.201805930
14. Wang, H., Feng, X., Chen, Y., Liu, Y.-S., Han, K.S., Zhou, M., Engelhard, M.H., Murugesan, V., Assary, R.S., and Liu, T.L. (2019a). Reversible electrochemical interface of Mg metal and conventional electrolyte enabled by intermediate adsorption. *ACS Energy Lett.* 5**,** 200-206. doi: 10.1021/acsenergylett.9b02211.
15. Ponrouch, A., Frontera, C., Bardé, F., and Palacín, M.R. (2016). Towards a calcium-based rechargeable battery. *Nat. Mater.* 15**,** 169-172. doi: 10.1038/nmat4462.
16. Shiga, T., Kato, Y., and Hase, Y. (2017). Coupling of nitroxyl radical as an electrochemical charging catalyst and ionic liquid for calcium plating/stripping toward a rechargeable calcium–oxygen battery. *J. Mater. Chem. A* 5**,** 13212-13219. doi: 10.1039/C7TA03422A
17. Wang, D., Gao, X., Chen, Y., Jin, L., Kuss, C., and Bruce, P.G. (2018a). Plating and stripping calcium in an organic electrolyte. *Nat. Mater.* 17**,** 16-20. doi: 10.1038/nmat5036.
18. Biria, S., Pathreeker, S., Li, H., and Hosein, I.D. (2019). Plating and Stripping of Calcium in an Alkyl Carbonate Electrolyte at Room Temperature. *ACS Appl. Energy Mater.* 2**,** 7738-7743. doi: 10.1021/acsaem.9b01670.
19. Li, Z., Fuhr, O., Fichtner, M., and Zhao-Karger, Z. (2019). Towards stable and efficient electrolytes for room-temperature rechargeable calcium batteries. *Energy Environ. Sci.* 12**,** 3496-3501. doi: 10.1039/C9EE01699F.
20. Shyamsunder, A., Blanc, L.E., Assoud, A., and Nazar, L.F. (2019). Reversible Calcium Plating and Stripping at Room Temperature Using a Borate Salt. *ACS Energy Lett.* 4**,** 2271-2276. doi: 10.1021/acsenergylett.9b01550.
21. Biria, S., Pathreeker, S., Genier, F.S., Li, H., and Hosein, I.D. (2020). Plating and Stripping Calcium at Room Temperature in an Ionic-Liquid Electrolyte. *ACS Appl. Energy Mater.* 3**,** 2310-2314. doi: 10.1021/acsaem.9b02529.
